# Supplementary material for: Transparent flexible organic solar cells with 6.87% efficiency manufactured by an all-solution process
Source: Royal Society of Chemistry journal article supplement (doi:10.1039/c3nr03011c), 2013-01-01
Supplement: c3nr03011c.pdf [file c3nr03011c.pdf]

## Supplementary information

† Electronic Supplementary Information (ESI) available: [J-V curve, bending tests, and impedance spectra]. See DOI: 10.1039/b000000x/

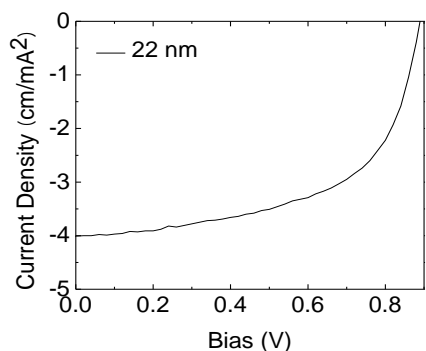

**Fig. S1.** J-V characteristics of transparent flexible OSCs with PANI of 22 nm.

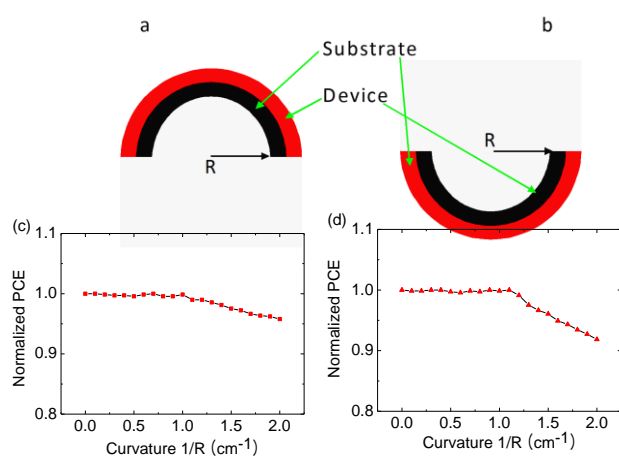

**Fig. S2.** Bending tests: (a) Inward bending (compressive), (b) outward bending (tensile), and normalized PCE based on (c) physical tensile test and (d) physical compressing test.

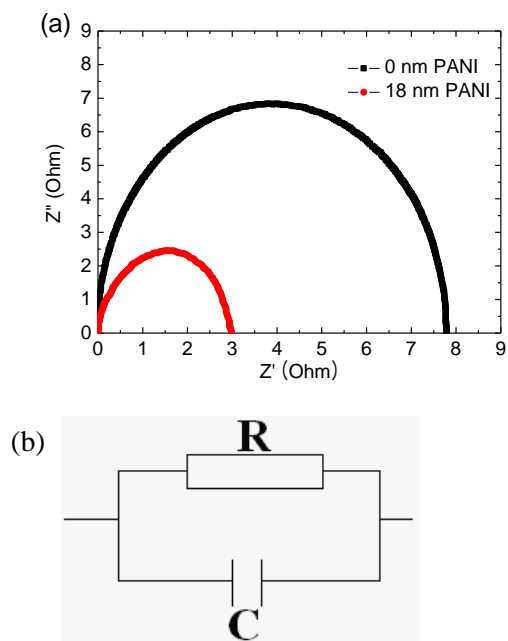

**Fig. S3.** (a) Impedance spectra of the transparent flexible OSCs with 18 nm and without PANI buffer layer in the dark at 0 V, and (b) equivalent RC circuit of the transparent flexible OSCs in the dark.
